# Supplementary material for: Physicochemical insights into semiconductor properties of a semitransparent tantalum nitride photoanode for solar water splitting
Source: Royal Society of Chemistry journal article supplement (doi:10.1039/d3cp02563b), 2023-01-01
Supplement: d3cp02563b1.pdf [file d3cp02563b1.pdf]

## Electronic Supplementary Information (ESI)

### **Physicochemical Insights into Semiconductor Properties of a Semitransparent Tantalum Nitride Photoanode for Solar Water Splitting**

Tomohiro Higashi,<sup>\*a</sup> Hiroshi Nishiyama,<sup>b</sup> Yuriy Pihosh,<sup>b</sup> Kaisei Wakishima,<sup>c</sup> Yudai Kawase,<sup>d</sup> Yutaka Sasaki,<sup>d</sup> Akira Nagaoka,<sup>c,e</sup> Kenji Yoshino,<sup>c</sup> Kazuhiro Takanabe,<sup>d</sup> and Kazunari Domen<sup>\*b,f</sup>

<sup>a</sup> *Institute for Tenure Track Promotion, University of Miyazaki, 1-1 Gakuen-kibanadai-nishi, Miyazaki, 889-2192, Japan.*

<sup>b</sup> *Office of University Professors, The University of Tokyo, 2-11-16 Yayoi, Bunkyo-ku, Tokyo, 113-8656, Japan.*

<sup>c</sup> *Electrical and Electronic Engineering Program, Faculty of Engineering, University of Miyazaki, 1-1 Gakuen-kibanadai-nishi, Miyazaki, 889-2192, Japan*

<sup>d</sup> *Department of Chemical System Engineering, School of Engineering, The University of Tokyo, 7-3-1 Hongo, Bunkyo-ku, Tokyo, 113-8656, Japan*

<sup>e</sup> *Research Center for Sustainable Energy & Environmental Engineering, University of Miyazaki, 1-1 Gakuen-kibanadai-nishi, Miyazaki, 889-2192, Japan*

<sup>f</sup> *Research Initiative for Supra-Materials, Shinshu University, 4-17-1 Wakasato, Nagano, 380-8533, Japan*

\*E-mails: domen@chemsys.t.u-tokyo.ac.jp , t\_higashi@cc.miyazaki-u.ac.jp

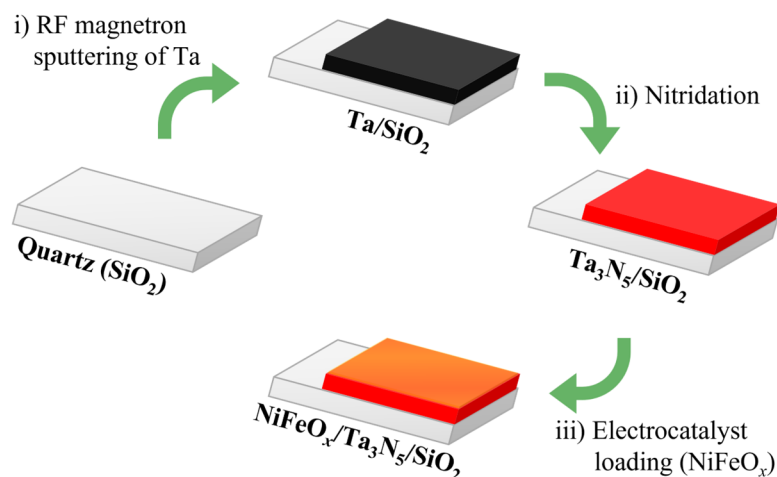

Figure S1. Schematic illustration of the preparation of NiFeO<sub>x</sub>/Ta<sub>3</sub>N<sub>5</sub>/SiO<sub>2</sub> thin films.

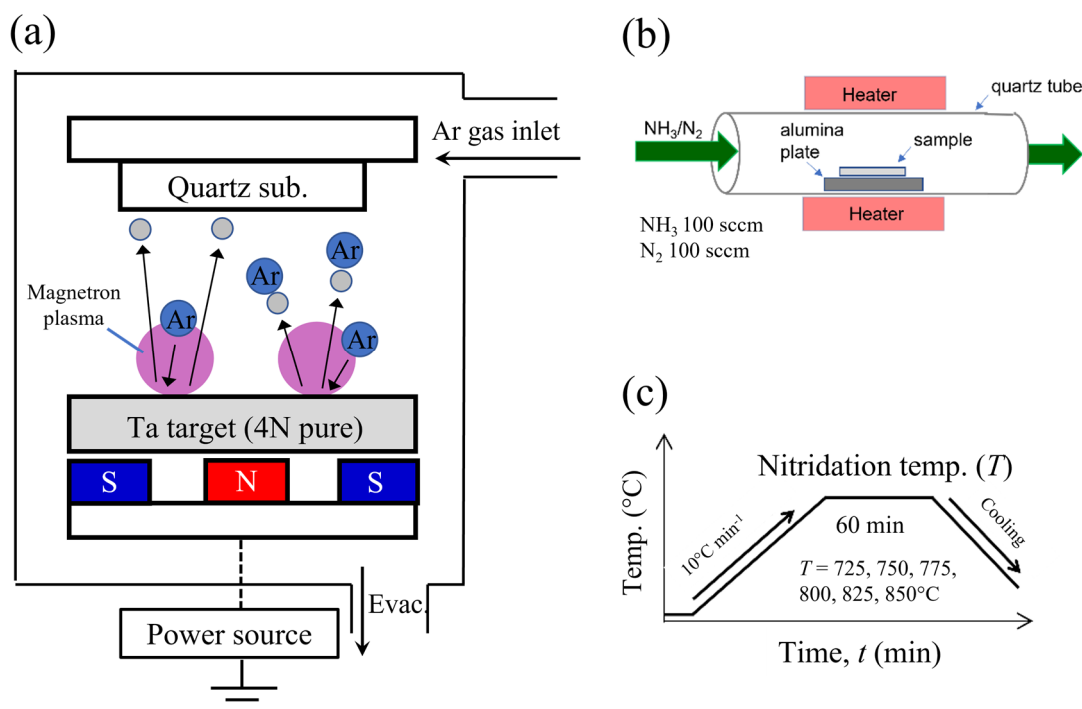

Figure S2. Fabrication process of Ta<sub>3</sub>N<sub>5</sub> thin film on double-side polished quartz insulating substrates (Ta<sub>3</sub>N<sub>5</sub>/SiO<sub>2</sub>). (a) Schematic depiction of RF magnetron sputtering process for the preparation of the precursor films on SiO<sub>2</sub> substrate. (b) schematic illustration of nitridation furnace under NH<sub>3</sub>/N<sub>2</sub> mixed gas flow with the ratio of NH<sub>3</sub> : N<sub>2</sub> = 100 sccm : 100 sccm. (c) Temperature program for nitridation reaction under different nitridation temperatures (*T*) in the range from 725 °C to 850 °C.

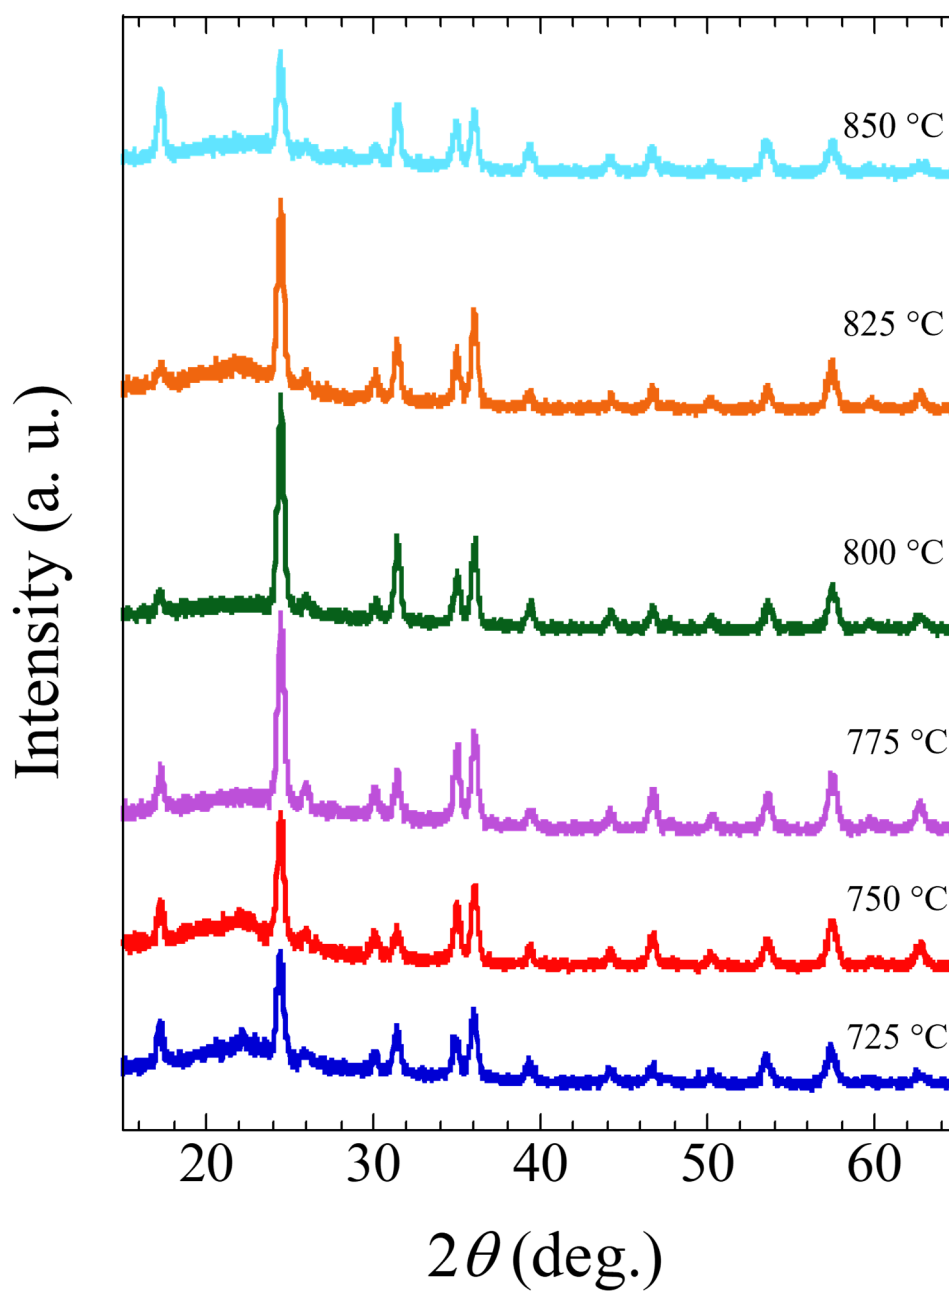

Figure S3. X-ray diffraction (XRD) patterns of Ta<sub>3</sub>N<sub>5</sub>/SiO<sub>2</sub> thin films prepared through the nitridation process with different temperatures ( $T$ ) of 725, 750, 775, 800, 825, and 850 °C. The XRD patterns of all Ta<sub>3</sub>N<sub>5</sub>/SiO<sub>2</sub> samples can be assigned to a single phase of the monoclinic Ta<sub>3</sub>N<sub>5</sub> material.

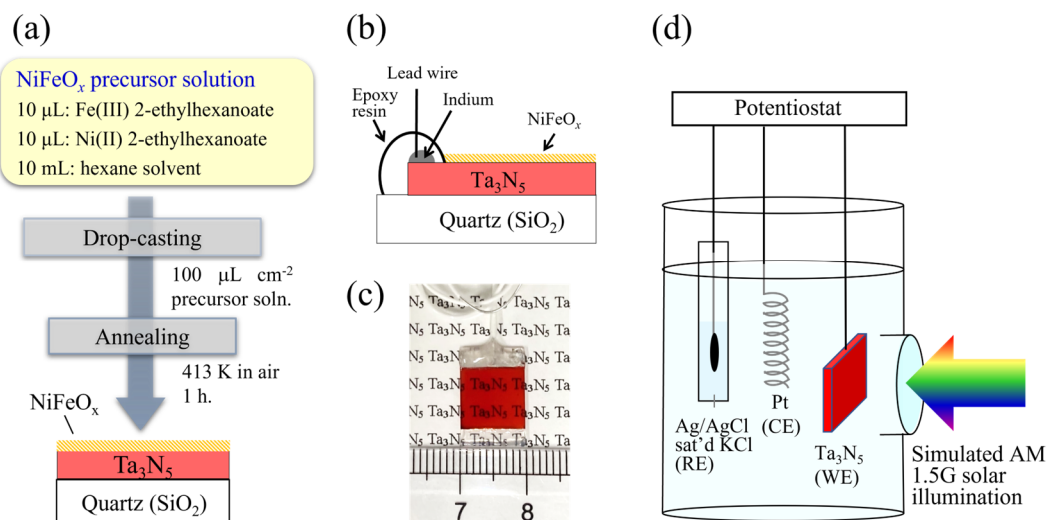

Figure S4. (a) Surface modification with NiFeO<sub>x</sub> electrocatalyst using a drop-casting method and thermal annealing on Ta<sub>3</sub>N<sub>5</sub>/SiO<sub>2</sub> thin film.<sup>1</sup> (b) Schematic and (c) photograph of NiFeO<sub>x</sub>/Ta<sub>3</sub>N<sub>5</sub>/SiO<sub>2</sub> semitransparent photoanodes employed in a (d) three-electrode configuration for the photoelectrochemical (PEC) measurements.

Table S1. PEC properties of NiFeO<sub>x</sub>/Ta<sub>3</sub>N<sub>5</sub>/SiO<sub>2</sub> thin films.

| Nitridation temperature (°C) | $J$ at 1.23 V <sub>RHE</sub> (mA cm <sup>-2</sup> ) | $E_{on}$ (V <sub>RHE</sub> ) | Maximum HC-STH (%) | Potential of maximum HC-STH (V <sub>RHE</sub> ) |
|------------------------------|-----------------------------------------------------|------------------------------|--------------------|-------------------------------------------------|
| 725                          | 3.0                                                 | 0.65                         | 0.45               | 0.95                                            |
| 750                          | 4.8                                                 | 0.65                         | 0.77               | 0.94                                            |
| 775                          | 5.9                                                 | 0.65                         | 1.03               | 0.94                                            |
| 800                          | 3.1                                                 | 0.65                         | 0.50               | 0.95                                            |
| 825                          | 2.5                                                 | 0.65                         | 0.41               | 0.95                                            |
| 850                          | 1.5                                                 | 0.72                         | 0.13               | 0.95                                            |

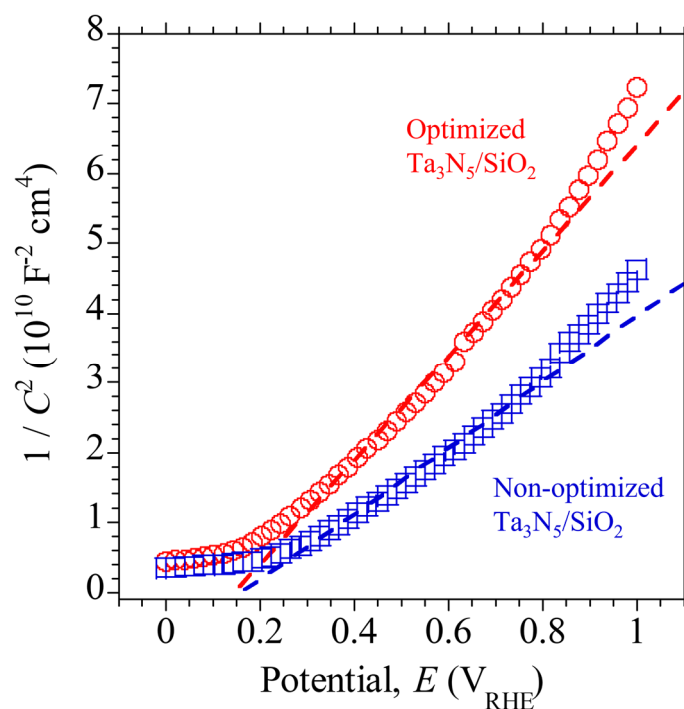

Figure S5. Mott-Schottky plots obtained from bare-Ta<sub>3</sub>N<sub>5</sub>/SiO<sub>2</sub> photoanodes at a potential modulation frequency of 1 kHz under dark conditions in 0.2 M potassium phosphate aqueous solution electrolyte (pH of 13, adjusted by KOH). The ac amplitude was 10 mV<sub>rms</sub>. The carrier concentrations ( $N_d$ ) of the optimized Ta<sub>3</sub>N<sub>5</sub>/SiO<sub>2</sub> (open circle colored in red) and the non-optimized Ta<sub>3</sub>N<sub>5</sub>/SiO<sub>2</sub> (open square colored in blue) were calculated to be  $1.0 \times 10^{20} \text{ cm}^{-3}$  and  $1.8 \times 10^{20} \text{ cm}^{-3}$ , respectively. To calculate the  $N_d$  values, the slope ranging from 0.8 V<sub>RHE</sub> to 0.3 V<sub>RHE</sub> (indicated by dashed lines) and the dielectric constant of 17 for the Ta<sub>3</sub>N<sub>5</sub> were used.<sup>3,4</sup>

Table S2. Electric properties of Ta<sub>3</sub>N<sub>5</sub>/SiO<sub>2</sub> thin films at room temperature

| Nitridation temperature (°C) | Resistivity, $\rho$ ( $\Omega$ cm) | Carrier concentration, $N_d$ ( $\text{cm}^{-3}$ ) | Hall mobility, $\mu_H$ ( $\text{cm}^2 \text{V}^{-1} \text{s}^{-1}$ ) | $J$ at 1.23 V <sub>RHE</sub> ( $\text{mA cm}^{-2}$ ) |
|------------------------------|------------------------------------|---------------------------------------------------|----------------------------------------------------------------------|------------------------------------------------------|
| 725                          | 0.091                              | $9.5 \times 10^{19}$                              | 0.72                                                                 | 3.0                                                  |
| 750                          | 0.067                              | $7.8 \times 10^{19}$                              | 1.21                                                                 | 4.8                                                  |
| 775                          | 0.061                              | $6.0 \times 10^{19}$                              | 1.72                                                                 | 5.9                                                  |
| 800                          | 0.074                              | $8.5 \times 10^{19}$                              | 1.02                                                                 | 3.1                                                  |
| 825                          | 0.090                              | $1.0 \times 10^{20}$                              | 0.70                                                                 | 2.5                                                  |
| 850                          | 0.178                              | $1.4 \times 10^{20}$                              | 0.25                                                                 | 1.5                                                  |

Table S3. Electric properties of Ta<sub>3</sub>N<sub>5</sub>-based photoelectrodes at room temperature.

| Materials and substrates                                                        | Film thickness (nm) | $\rho$ ( $\Omega$ cm) | $N_d$ ( $\text{cm}^{-3}$ ) | $\mu_H$ ( $\text{cm}^2 \text{V}^{-1} \text{s}^{-1}$ ) | $J$ at 1.23 V <sub>RHE</sub> ( $\text{mA cm}^{-2}$ ) |
|---------------------------------------------------------------------------------|---------------------|-----------------------|----------------------------|-------------------------------------------------------|------------------------------------------------------|
| Ta <sub>3</sub> N <sub>5</sub> /quartz <sup>1*</sup>                            | 850                 | 0.016                 | $2.2 \times 10^{20}$       | 1.9                                                   | 5.1                                                  |
| Ta <sub>3</sub> N <sub>5</sub> /quartz <sup>2*</sup>                            | 1000                | 0.068                 | $5.8 \times 10^{19}$       | 1.6                                                   | 6.0                                                  |
| Ta <sub>3</sub> N <sub>5</sub> /FTO <sup>3**</sup>                              | 115                 | 1.43                  | $2.31 \times 10^{19}$      | 0.19                                                  | 2.4                                                  |
| Ta <sub>3</sub> N <sub>5</sub> /Ta-foil <sup>4**</sup>                          | 960                 | 0.45                  | $4.7 \times 10^{18}$       | 2.9                                                   | 0.16                                                 |
| Ta <sub>3</sub> N <sub>5</sub> single crystal <sup>5*</sup>                     | —                   | 5-8                   | $10^{18} - 10^{19}$        | 0.1 – 1.5                                             | —                                                    |
| Ta <sub>3</sub> N <sub>5</sub> -NRs/Ta <sup>6***</sup>                          | 600                 | —                     | $3.7 \times 10^{19}$       | —                                                     | 4.0                                                  |
| Ta <sub>3</sub> N <sub>5</sub> (100)-epitaxial/LaAlO <sub>3</sub> <sup>7*</sup> | 60                  | 0.11                  | $6.5 \times 10^{19}$       | 0.90                                                  | —                                                    |
| Ta <sub>3</sub> N <sub>5</sub> (001)-epitaxial/LaAlO <sub>3</sub> <sup>7*</sup> | 60                  | 0.045                 | $2.5 \times 10^{20}$       | 0.54                                                  | —                                                    |

\*The data was acquired by Hall effect measurements at room temperature.

\*\* Ta<sub>3</sub>N<sub>5</sub> films were prepared on the quartz substrate using the same manner to fabricate the Ta<sub>3</sub>N<sub>5</sub> on the conductive FTO and Ta-foil substrates.

\*\*\* The data were acquired by Mott- Schottky analysis.

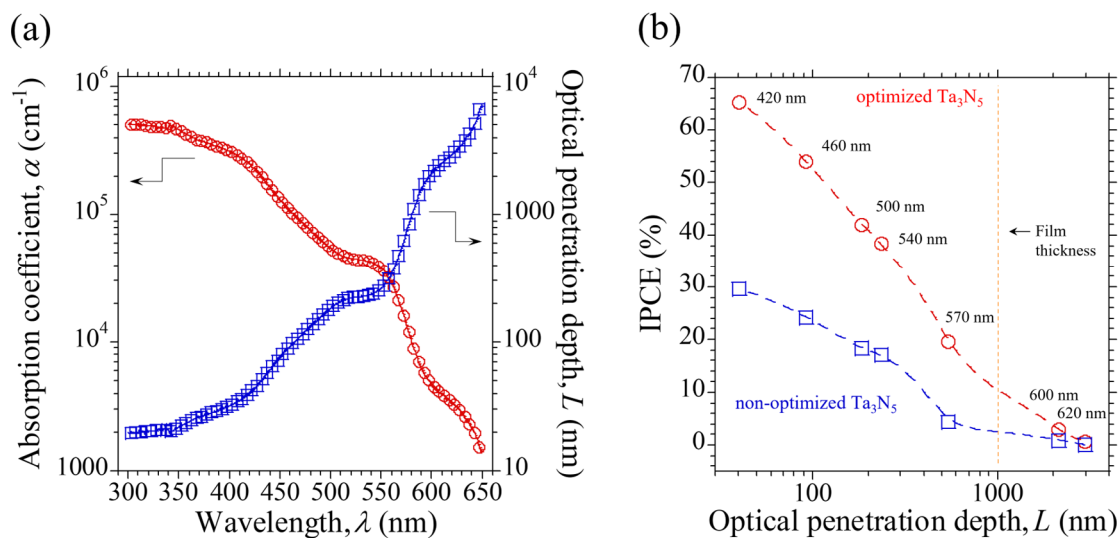

Figure S6. (a) Absorption coefficient ( $\alpha$ ) and optical penetration depth ( $L$ ) of Ta<sub>3</sub>N<sub>5</sub>/SiO<sub>2</sub> thin films calculated from transmission/reflection spectrum of previously reported Ta<sub>3</sub>N<sub>5</sub>/SiO<sub>2</sub> with 200-nm-thick Ta<sub>3</sub>N<sub>5</sub> film.<sup>8</sup> (b) Plot of IPCE values as a function of the  $L$  derived from the absorption coefficient spectra. The IPECs were obtained from the monochromatic light illumination at the wavelengths of 420, 460, 500, 540, 570, 600, and 620 nm.



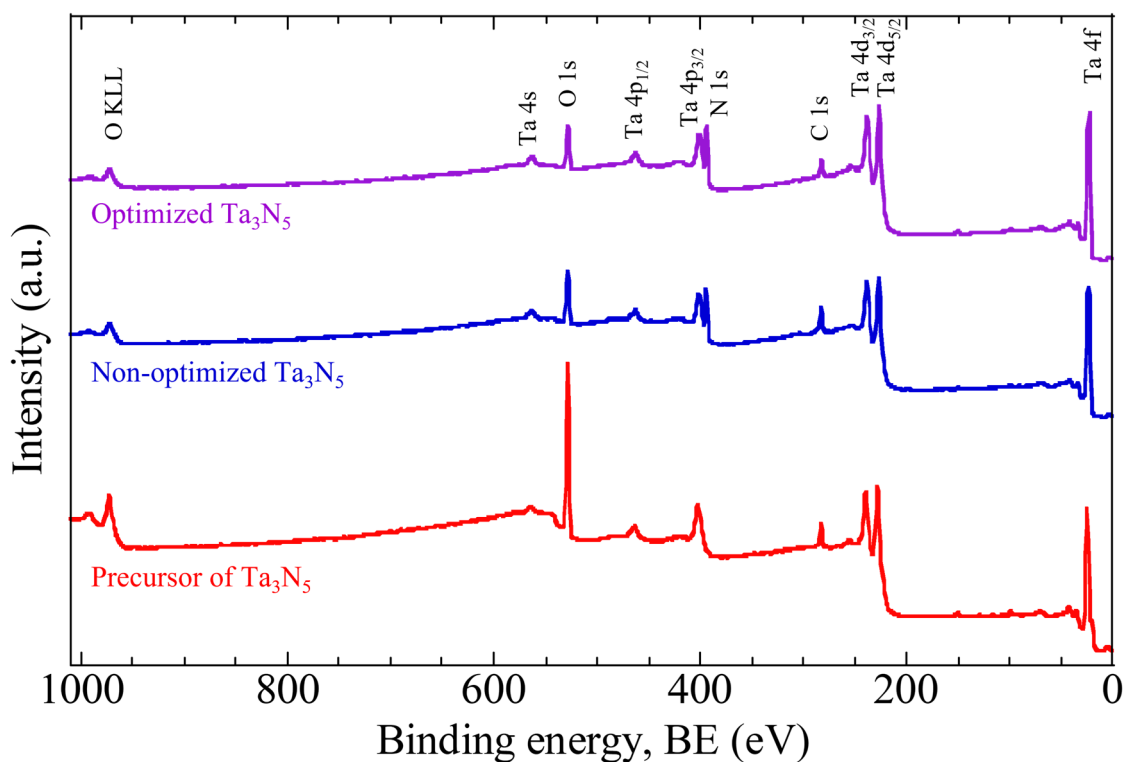

Figure S7. X-ray photoelectron spectroscopy (XPS) overall spectra of optimized Ta<sub>3</sub>N<sub>5</sub>/SiO<sub>2</sub>, non-optimized Ta<sub>3</sub>N<sub>5</sub>/SiO<sub>2</sub>, and precursor of Ta<sub>3</sub>N<sub>5</sub>/SiO<sub>2</sub> (Ta/SiO<sub>2</sub>).

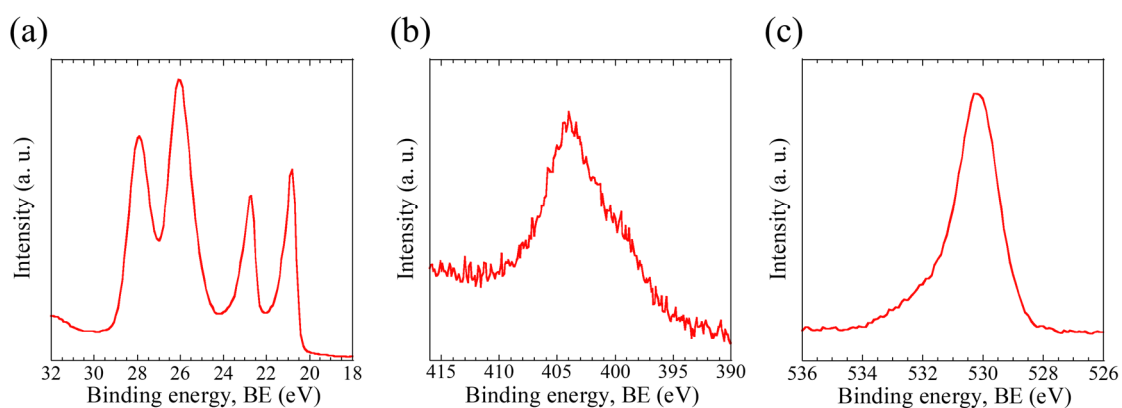

Figure S8. High-resolution XPS spectrum of mirror-polished Ta-metal plate as a reference, (a) Ta 4f, (b) Ta 4p<sub>3/2</sub>, and (c) O 1s.

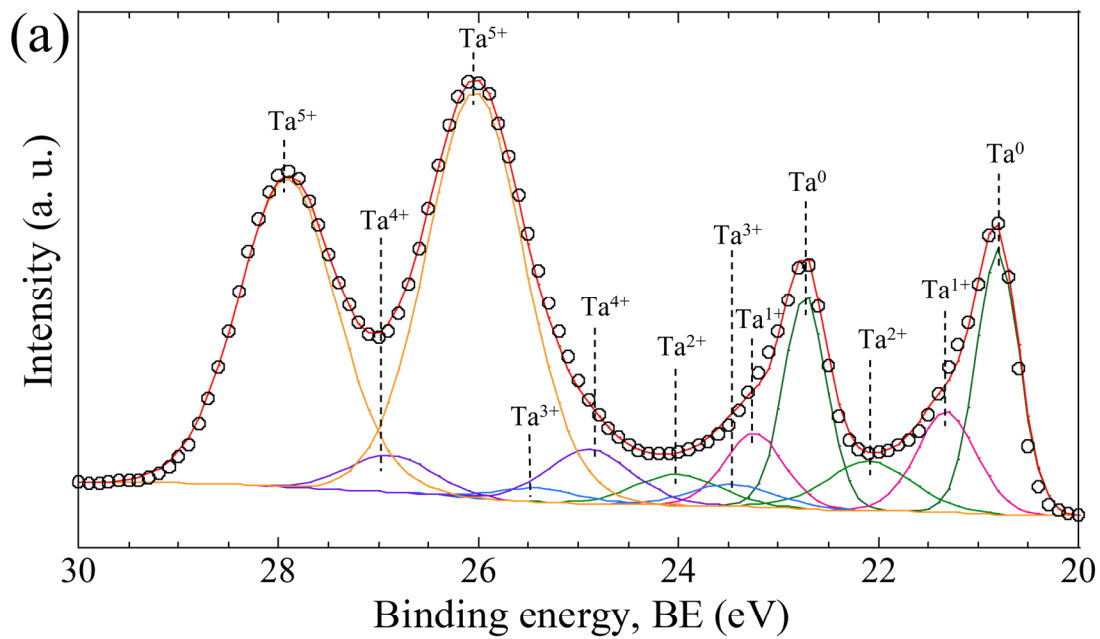

(b)

| Sub oxide state of Ta                              | Ta 4f 7/2 (FWHM) | Ta 4f 5/2 (FWHM) |
|----------------------------------------------------|------------------|------------------|
| Ta <sup>0</sup> (metal)                            | 20.8 eV (0.50)   | 22.7 eV (0.50)   |
| Ta <sup>1+</sup> (Ta <sub>2</sub> O)               | 21.3 eV (0.70)   | 23.2 eV (0.70)   |
| Ta <sup>2+</sup> (TaO)                             | 22.1 eV (1.00)   | 24.0 eV (1.00)   |
| Ta <sup>3+</sup> (Ta <sub>2</sub> O <sub>3</sub> ) | 23.5 eV (1.00)   | 25.4 eV (1.00)   |
| Ta <sup>4+</sup> (TaO <sub>2</sub> )               | 25.0 eV (1.00)   | 26.9 eV (1.00)   |
| Ta <sup>5+</sup> (Ta <sub>2</sub> O <sub>5</sub> ) | 26.0 eV (1.15)   | 27.9 eV (1.15)   |

Figure S9. XPS spectrum of Ta 4f peaks on mirror-polished Ta-metal plate with peak fitting curves (a) and XPS Ta 4f binding energies and full-width half-maximum (FWHM) in the peak fits for the spectrum (b).

Table S4. Surface concentration ratio of Ta, N, O elements on Ta<sub>3</sub>N<sub>5</sub>/SiO<sub>2</sub>.

|                                                                | Surface concentration ratio (%) |                  |                  |
|----------------------------------------------------------------|---------------------------------|------------------|------------------|
|                                                                | Ta / (Ta + N + O)               | N / (Ta + N + O) | O / (Ta + N + O) |
| Optimized Ta <sub>3</sub> N <sub>5</sub> /SiO <sub>2</sub>     | 33.7                            | 43.4             | 22.9             |
| Non-optimized Ta <sub>3</sub> N <sub>5</sub> /SiO <sub>2</sub> | 32.7                            | 37.3             | 30.0             |
| Precursor film (Ta/SiO <sub>2</sub> )                          | 31.7                            | —                | 68.3             |
| Ta-metal plate (reference)                                     | 37.3                            | —                | 62.7             |

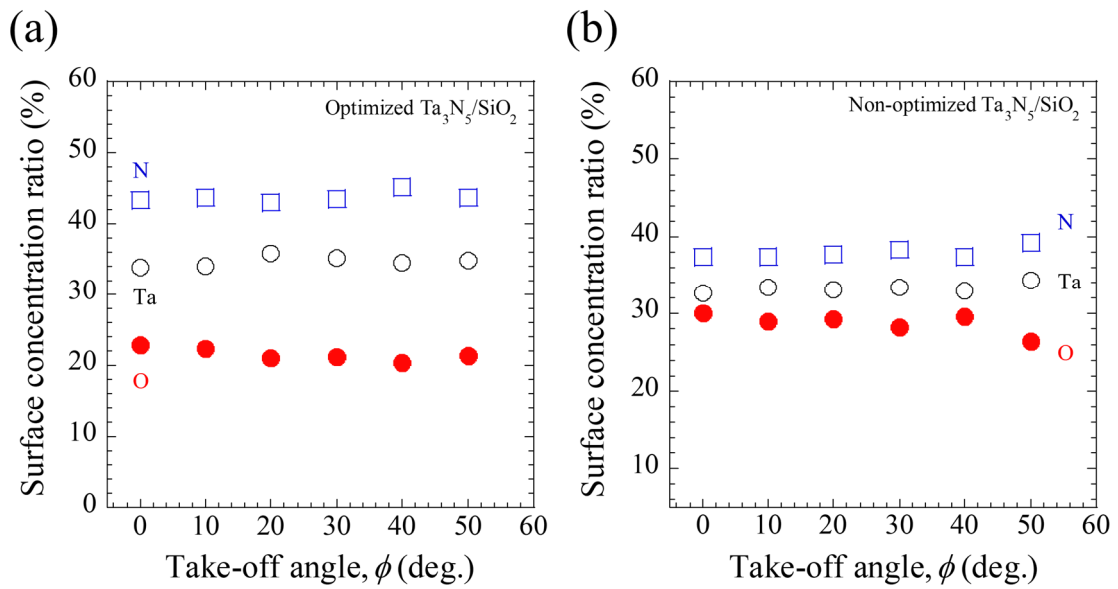

Figure S10. Surface concentration ratios of (a) optimized and (b) non-optimized Ta<sub>3</sub>N<sub>5</sub>/SiO<sub>2</sub> thin films evaluated through the results of AR-XPS analysis.

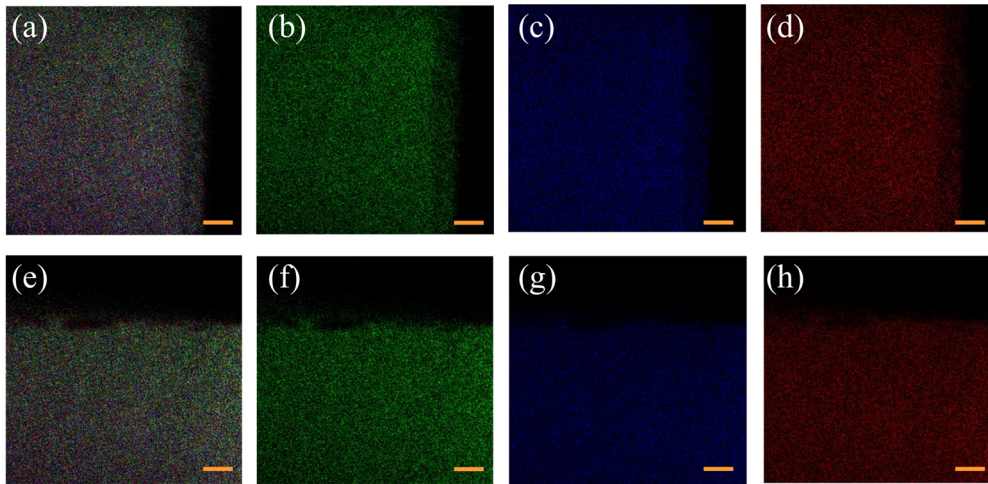

Figure S11. XPS-mapping for optimized  $\text{Ta}_3\text{N}_5/\text{SiO}_2$  (a-d) and non-optimized  $\text{Ta}_3\text{N}_5/\text{SiO}_2$  (e-h) thin films. (a and e) mixed map, (b and f) Ta  $4f_{7/2}$  map, (c and g) N 1s map, (d and h) O 1s map. Scale bars (a-h) are 50  $\mu\text{m}$ .

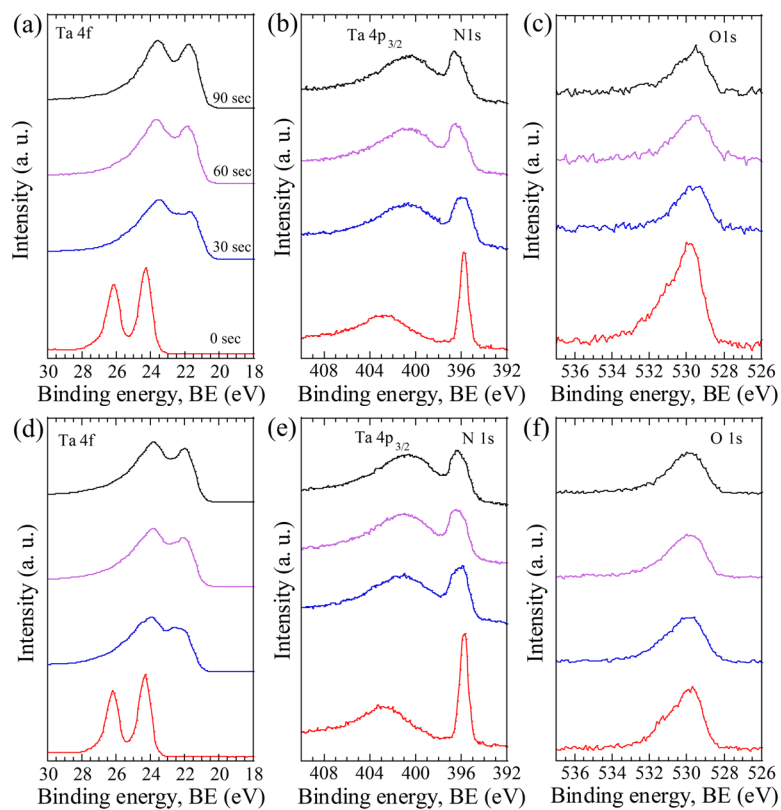

Figure S12. High-resolution XPS spectra after Ar-etching treatment over 0 sec (in red), 30 sec (in blue), 60 sec (in purple), and 90 sec (in black) of  $\text{Ta}_3\text{N}_5/\text{SiO}_2$  thin films. The panels (a-c) and (d-f) correspond to XPS spectra of optimized  $\text{Ta}_3\text{N}_5/\text{SiO}_2$  and non-optimized  $\text{Ta}_3\text{N}_5/\text{SiO}_2$ , respectively.

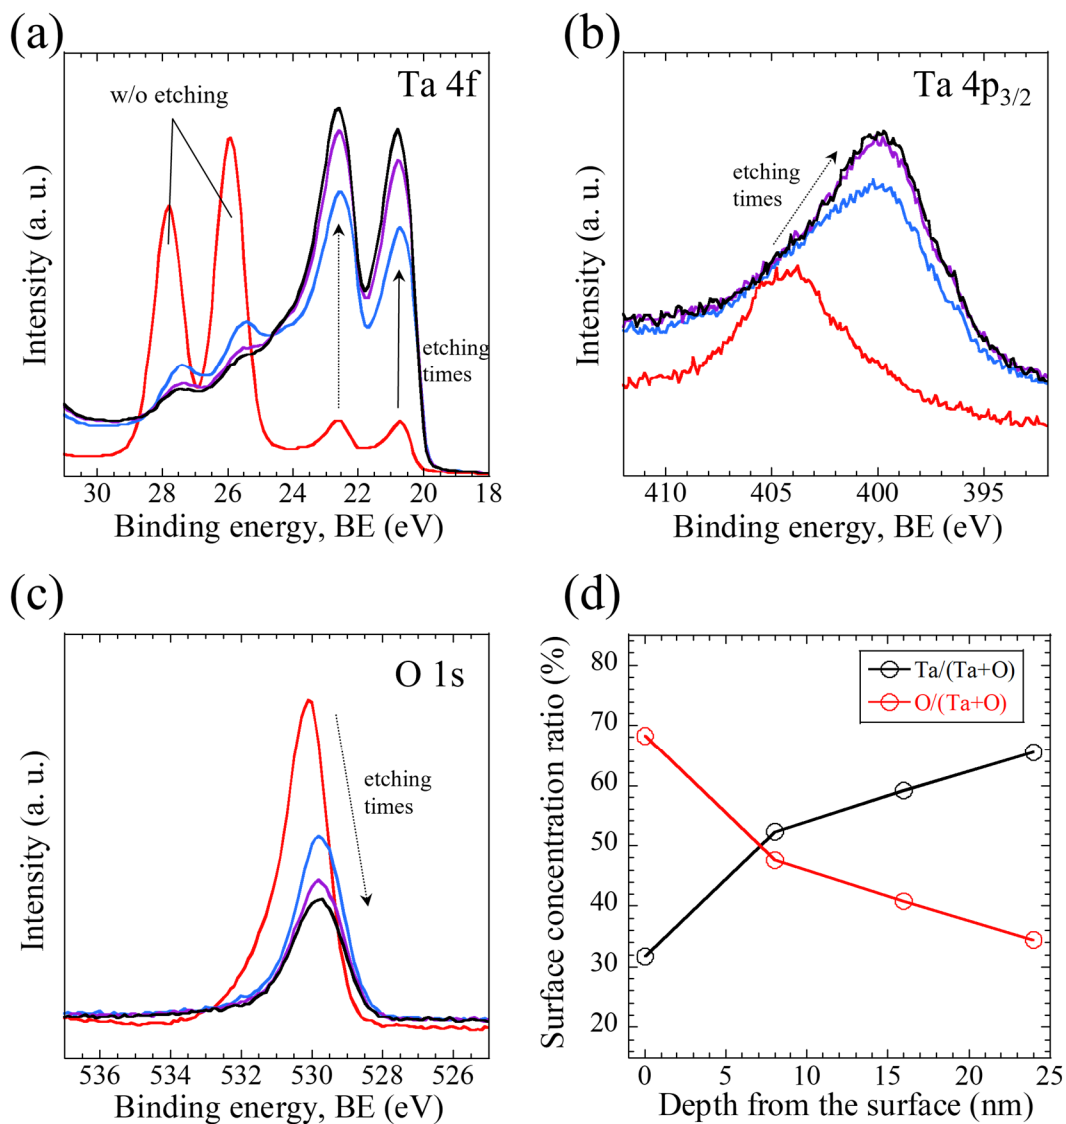

Figure S13. High-resolution XPS spectra of the precursor film (Ta/SiO<sub>2</sub>) of Ta<sub>3</sub>N<sub>5</sub>/SiO<sub>2</sub> after Ar-etching treatment over 0 sec (in red), 30 sec (in blue), 60 sec (in purple), and 90 sec (in black). (a) Ta 4f, (b) Ta 4p<sub>3/2</sub>, (c) O 1s. The arrows indicated the intensity of the XPS signal varies associated with repetitive Ar-etching. (d) Depth profile for surface concentration ratio of Ta and O on Ta/SiO<sub>2</sub>.

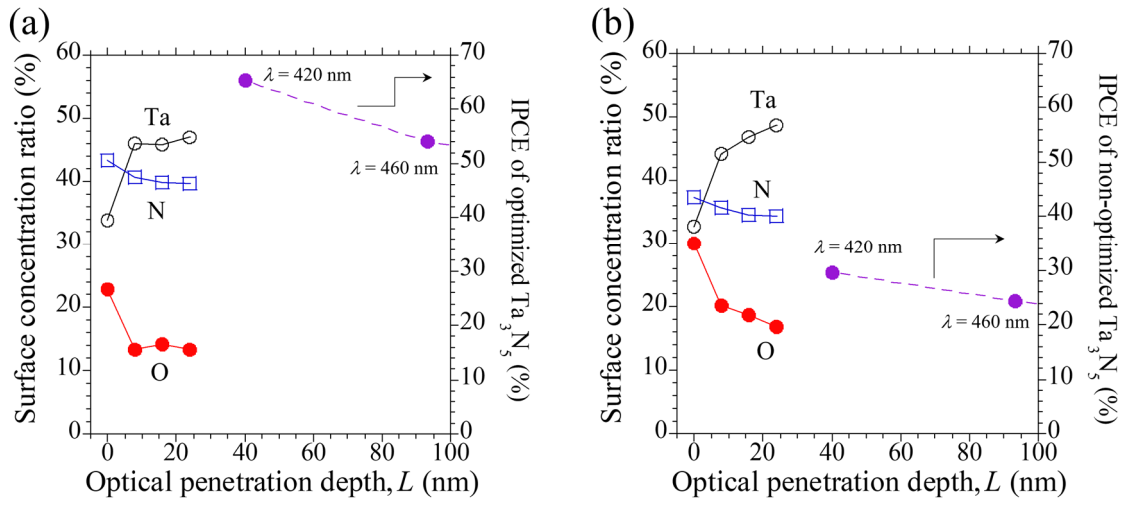

Figure S14. Plot of surface concentration ratio and IPCE values at 420 and 460 nm monochromatic light as a function of optical penetration depth ( $L$ ) of the Ta<sub>3</sub>N<sub>5</sub>/SiO<sub>2</sub> thin film for optimized- (a) and non-optimized (b) samples. The  $L$  was calculated from the absorption coefficients of previously reported Ta<sub>3</sub>N<sub>5</sub> thin film (Fig. S6).<sup>8</sup>

Table S5. Summary of PEC and electrical properties of Ta<sub>3</sub>N<sub>5</sub>/SiO<sub>2</sub>

|                                                                                            | $J$ at 1.23 $V_{\text{RHE}}$<br>(mA cm <sup>-2</sup> ) | IPCE at 1.23 $V_{\text{RHE}}$<br>at 420 nm<br>(%) | $\sigma$<br>(S cm <sup>-1</sup> ) | $N_{\text{d}}$<br>(cm <sup>-3</sup> ) | $\mu_{\text{H}}$<br>(cm <sup>2</sup> V <sup>-1</sup> s <sup>-1</sup> ) |
|--------------------------------------------------------------------------------------------|--------------------------------------------------------|---------------------------------------------------|-----------------------------------|---------------------------------------|------------------------------------------------------------------------|
| Optimized<br>Ta <sub>3</sub> N <sub>5</sub> /SiO <sub>2</sub><br>processed at<br>775°C     | 5.9                                                    | 65                                                | 16.4                              | $6.0 \times 10^{19}$                  | 1.72                                                                   |
| Non-optimized<br>Ta <sub>3</sub> N <sub>5</sub> /SiO <sub>2</sub><br>processed at<br>825°C | 2.5                                                    | 28                                                | 11.1                              | $1.0 \times 10^{20}$                  | 0.70                                                                   |

## References

1. Y. Kawase, T. Higashi, M. Katayama, K. Domen and K. Takanabe, *ACS Appl. Mater. Interfaces*, 2021, **13**, 16317-16325.
2. T. Higashi, H. Nishiyama, Y. Otsuka, Y. Kawase, Y. Sasaki, M. Nakabayashi, M. Katayama, T. Minegishi, N. Shibata, K. Takanabe, T. Yamada and K. Domen, *ChemSusChem*, 2020, **13**, 1974-1978.
3. H. Hajibabaei, D. J. Little, A. Pandey, D. Wang, Z. Mi and T. W. Hamann, *ACS Appl. Mater. Interfaces*, 2019, **11**, 15457-15466.
4. A. Ziani, E. Nurlaela, D. S. Dhawale, D. A. Silva, E. Alarousu, O. F. Mohammed and K. Takanabe, *Phys. Chem. Chem. Phys.*, 2015, **17**, 2670-2677.
5. L. Jin, F. Cheng, H. Li and K. Xie, *Angew. Chem. Int. Ed.*, 2020, **59**, 8891-8895.
6. Y. Li, L. Zhang, A. Torres-Pardo, J. M. González-Calbet, Y. Ma, P. Oleynikov, O. Terasaki, S. Asahina, M. Shima, D. Cha, L. Zhao, K. Takanabe, J. Kubota and K. Domen, *Nat. Commun.*, 2013, **4**, 2566.
7. Y. Wang, Y. Hirose, T. Wakasugi, Y. Masubuchi, M. Tsuchii, Y. Sugisawa, D. Sekiba, A. Chikamatsu and T. Hasegawa, *J. Phys. Chem. Lett.*, 2021, **12**, 12323-12328.
8. T. Higashi, Y. Sasaki, Y. Kawase, H. Nishiyama, M. Katayama, K. Takanabe and K. Domen, *Catalysts*, 2021, **11**, 584.
